# Supplementary material
Source: PubMed Central journal article supplement (PMC2857041)
Supplement: supp_M109.045963_jbc.M109.045963-1.pdf [file supp_M109.045963_jbc.M109.045963-1.pdf]

## Online data supplement

### TGF-BETA1 INDUCES EXPRESSION OF HUMAN COAGULATION FACTOR XII VIA SMAD3 AND JNK SIGNALING PATHWAYS IN HUMAN LUNG FIBROBLASTS

Ewa Jablonska<sup>1</sup>, Philipp Markart<sup>2</sup>, Dariusz Zakrzewicz<sup>1</sup>, Klaus T. Preissner<sup>1</sup>,  
Malgorzata Wygrecka<sup>1</sup>

From the Departments of <sup>1</sup>Biochemistry and <sup>2</sup>Internal Medicine, Faculty of Medicine, Justus-Liebig-University, 35392 Giessen, Germany

Running title: TGF- $\beta$ 1 induces FXII expression in human lung fibroblasts

Address correspondence to: M. Wygrecka, Ph.D. Department of Biochemistry, Faculty of Medicine, Justus-Liebig-University Giessen, Friedrichstrasse 24, 35392 Giessen, Germany

Phone: +49-641-99-47507. Email: [malgorzata.wygrecka@innere.med.uni-giessen.de](mailto:malgorzata.wygrecka@innere.med.uni-giessen.de).

#### Supplementary figure legend

**Figure 1S. PI3K, MEK and p38 activities are not required to regulate TGF- $\beta$ 1-induced FXII expression in HLF.** (A, C, E) Western blot analysis of TGF- $\beta$ 1 induced FXII expression in HLF. HLF were treated with various concentrations of (A) PI3K (Wort), (C) MEK (PD98059) or (E) p38 (SB203580) inhibitors for 1 h prior to incubation with TGF- $\beta$ 1 for 48 h. Cell lysates were prepared and FXII expression was examined.  $\beta$ -actin was used as a loading control. The western blot illustrated is from one representative experiment out of five. (B, D, F) Densitometric analysis of (A), (C), and (E), respectively. Data are presented as mean  $\pm$  SD; n = 5; \*\* p < 0.01; \*\*\* p < 0.001. TGF- $\beta$ 1, transforming growth factor- $\beta$ 1; FXII, coagulation factor XII; wort, wortmannin; HLF, human lung fibroblasts; NS, not significant.

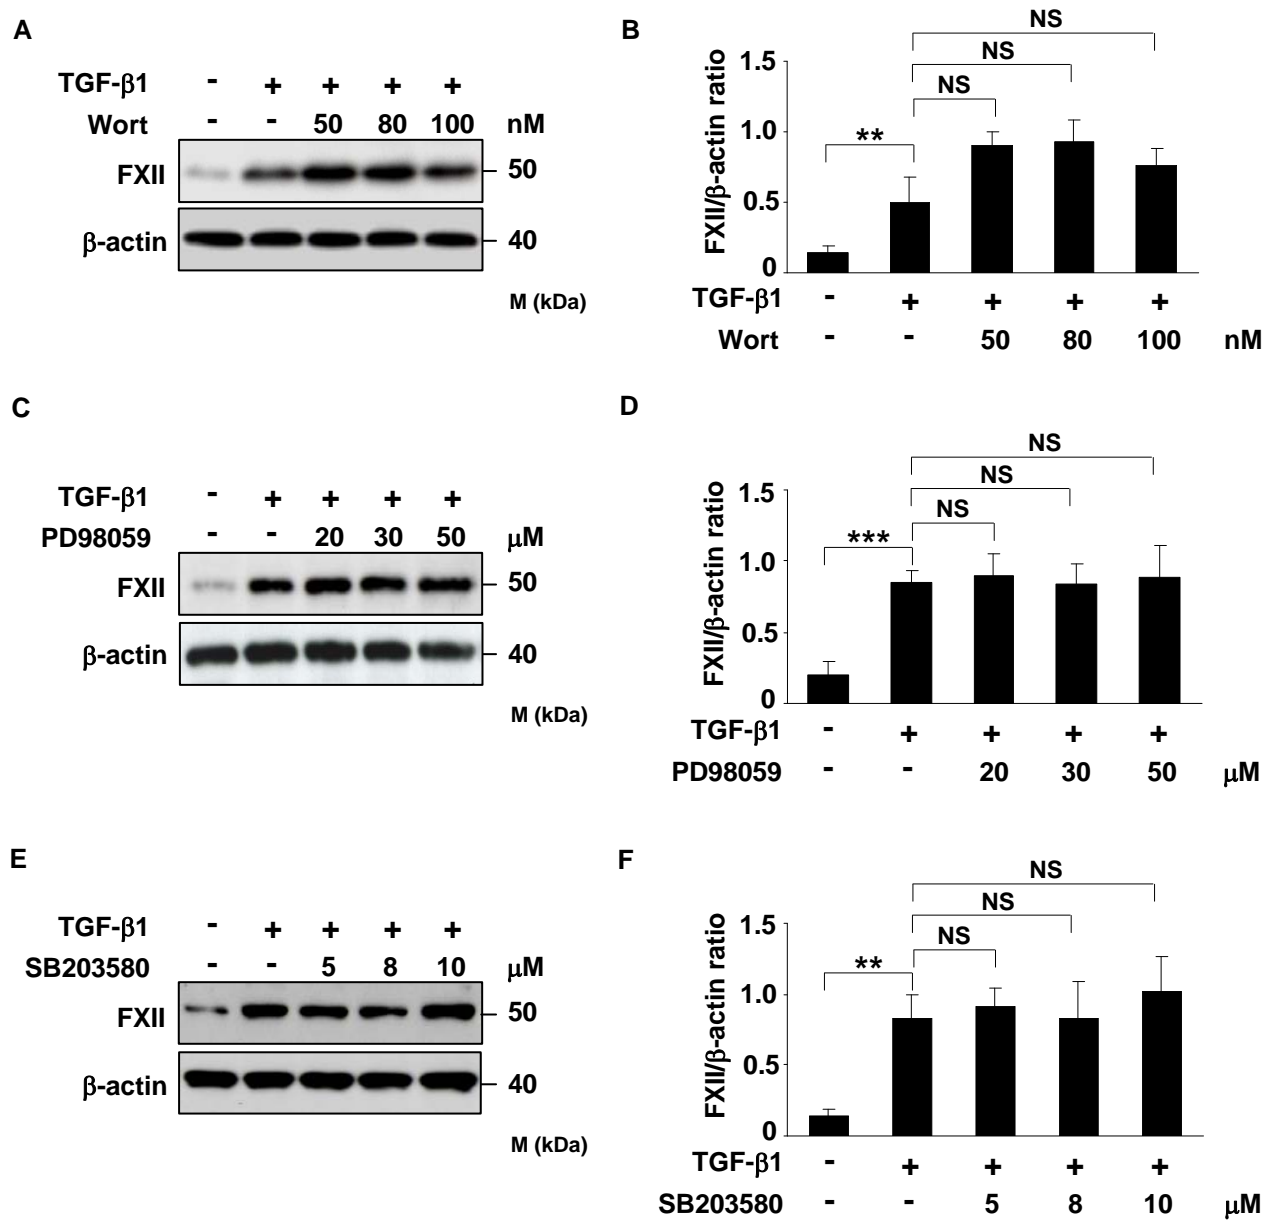

Figure 1S
